# Supplementary material
Source: Springer Nature journal article supplement (https://www.springermedizin.de/resource/supplementary/12891_2012_1557_MOESM7_ESM.pdf/9508368)

Basocervical or complex fracture type

Non - optimal screw position

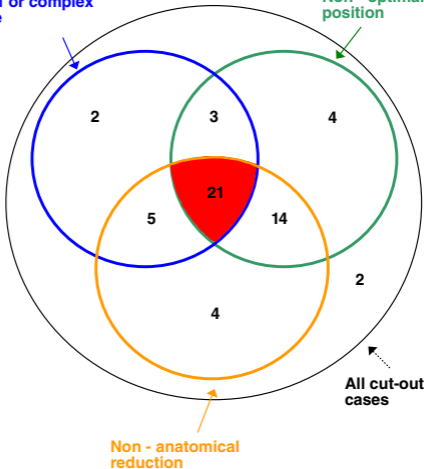

Supplement: MOESM7 [file 9508368]
